# Supplementary material
Source: publisher figshare collection journal article supplement (https://sage.figshare.com/ndownloader/files/18037931)

**Appendix 3.** Species richness patterns of epiphytes along elevation in “El Cielo” Biosphere Reserve”.

Each point represents alpha diversity per plot overall (upper figure) and per family (lower figure) of the semi-deciduous forest (**SDF**), the tropical montane cloud forest (**TMCF**), the submontane scrub (**SMS**) and the pine-oak forest in the reserve (**POF**). Colors represent the slope; grey dots represent plots along the leeward slope and black dots represent plots along the windward slope. Coefficient of determination and p value are shown in each case.

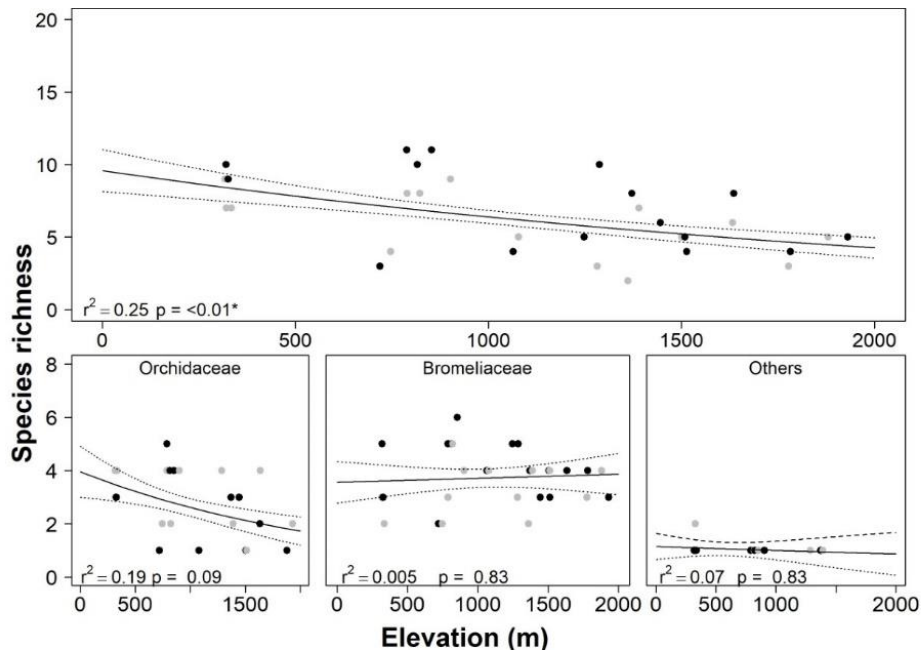

Supplement: Supplementary file 1 [file 18037931]
